# Supplementary material
Source: publisher site journal article supplement (https://www.dovepress.com/article/476077)
Supplement: Supplementary file 1 [file get_supplementary_file.php]

**Supplementary Tables**

Supplementary Table 1 Primer sequences used in this study

| Name | Sequences (5'-3') |
| --- | --- |
| GAPDH-F | GAGTCAACGGATTTGGTCGT |
| GAPDH-R | TTGATTTTGGAGGGATCTCG |
| SPHK2-F | CTCCTAGATCGCCCTGACTG |
| SPHK2-R | GCAACAGTGAGCAGTTGAGC |
| CABP4-F | CTCCCCAGATTGAAGGAACA |
| CABP4-R | ACCAAAGCCTCAAAGCTGAA |
| COL23A1 -F | CCTCATCAGCCTCCAAACTC |
| COL23A1-R | GGCCTCCTGAATGTGGTAGA |
| PROK2 -F | CACTGATGGGAATCCAGCTT |
| PROK2-R | TTCCTTCTGTCCACACACCA |
| LRRIQ3-F | CCCCGGAATATTGGAGTCTT |
| LRRIQ3-R  H4C8-F  H4C8-R  CXCL1-F  CXCL1-R | CAAGGTAGGCAGCCTGAAAA  AGGTGTTCCTGGAGAACGTG  GGCCTTTGGTTGAAAATGAA  AGGGAATTCACCCCAAGAAC  CACCAGTGAGCTTCCTCCTC |
| PCNA-F | GGCGTGAACCTCACCAGTAT |
| PCNA-R | TCTCGGCATATACGTGCAAA |
| CyclinD1 | GAGGAAGAGGAGGAGGAGGA |
| CyclinD1 | GAGATGGAAGGGGGAAAGAG |
| MMP-9 | AGGCAGGAGAATTGCTTGAA |
| MMP-9 | TCAAAGCCCTATTTGGGAAA |

Supplementary Table 2 Top 10 up- and down-regulated DEGs from transcriptome sequencing results

| Gene | Description | log2FoldChange | pval | up/down |
| --- | --- | --- | --- | --- |
| CABP4 | calcium binding protein 4 | 4.885597372 | 0.003061472 | up |
| COL23A1 | collagen type XXIII alpha 1 chain | 4.828921712 | 0.003930039 | up |
| PROK2 | prokineticin 2 | 4.361834795 | 0.002012208 | up |
| STUM | stum, mechanosensory transduction mediator homolog | 4.199432018 | 0.035105633 | up |
| C1orf210 | chromosome 1 open reading frame 210 | 3.460869644 | 0.00483809 | up |
| ORM2 | orosomucoid 2 | 3.442805205 | 0.034355078 | up |
| CDH1 | cadherin 1 | 3.367669282 | 0.043382123 | up |
| GCM1 | glial cells missing transcription factor 1 | 3.342968265 | 0.000766746 | up |
| P2RX2 | purinergic receptor P2X 2 | 3.200030243 | 0.00270095 | up |
| PIWIL2 | piwi like RNA-mediated gene silencing 2 | 3.194278364 | 4.9379E-08 | up |
| LRRIQ3 | leucine rich repeats and IQ motif containing 3 | -3.783226793 | 0.0081559 | down |
| H4C8 | H4 clustered histone 8 | -3.318211143 | 0.0481389 | down |
| CXCL1 | C-X-C motif chemokine ligand 1 | -2.966818593 | 3.1964E-05 | down |
| NTSR1 | neurotensin receptor 1 | -2.764485696 | 0.004470641 | down |
| CHTF8 | chromosome transmission fidelity factor 8 | -2.676179511 | 0.041409728 | down |
| TBCEL-TECTA | TBCEL-TECTA readthrough | -2.591057486 | 0.009177141 | down |
| CSF3 | colony stimulating factor 3 | -2.533844769 | 0.030297997 | down |
| MT1X | metallothionein 1X | -2.396698013 | 0.041553781 | down |
| ROBO4 | roundabout guidance receptor 4 | -2.386819223 | 0.040546849 | down |
| CCDC184 | coiled-coil domain containing 184 | -2.367707303 | 0.001194908 | down |
